# Supplementary material for: A Strategy for the Production and Molecular Validation of Agrobacterium-Mediated Intragenic Octoploid Strawberry
Source: MDPI journal article supplement (doi:10.3390/plants10112229), 2021-10-20

**Supplementary Table S1** List of primers used for vector construction and PCR analysis of transformants.

| Primer name  | Sequence (5'-3')                          | Amplicon size (bp) | purpose                                            |
|--------------|-------------------------------------------|--------------------|----------------------------------------------------|
| CM2268       | gtacggtcagtccttATGGCCGAGGTTT<br>CTCG      | 1590+32            | FvSTP8 CDS with adaptor (lowercase letters)        |
| CM2269       | caggagagttgtgatCTACAACTGTGTAA<br>CAGGATC  |                    |                                                    |
| ZT067        | aagggactgaccgtacccggggatcgat              |                    | Reverse PCR for                                    |
| ZT068        | atcaacaactctcctggcgac                     | 11772              | vector backbone 1                                  |
| CM2328       | gttacacagtttagATTTTGAAGAAGCGT<br>CAGGGTTC | 401+30             | FvSTP8 terminator with adaptor (lowercase letters) |
| CM2329       | cgaattaattcggggCACAACAAGCACAA<br>AACTTACA |                    |                                                    |
| CM2269       | caggagagttgtgatCTACAACTGTGTAA<br>CAGGATC  | 10748              | Reverse PCR for vector backbone 2                  |
| ZT069        | ccccgaattaattcggcgtaattcag                |                    |                                                    |
| CM2140       | gtgatcgattccgagcaaac (3' end of promoter) | 528                | Direct PCR identification of transformants         |
| CM2340       | AGCAAGATCTTGAGCTGCAG (mid FvSTP8)         |                    |                                                    |
| pMDC162-Kan1 | caatgtcataccactgtccgc                     |                    | PCR analysis the                                   |
| pMDC162-Kan2 | ctcatgagtgaggccgatg                       | 400                | potential integration of backbone DNA              |

**Supplementary Table S2** Sequence information of the oligonucleotides used for droplet digital PCR (ddPCR) in this study.

| Target                                          | Oligo Name           | Sequence (5'-3')                     | Amplicon (bp) | Note                                                                                                                 |
|-------------------------------------------------|----------------------|--------------------------------------|---------------|----------------------------------------------------------------------------------------------------------------------|
| Reference gene (glutathione S-transferase DHAR) | Ref-F                | AGGCACATGTATGTGTTC<br>TCTCA          | 178           | Oligos used match one copy per genome: FxaC_26g17540                                                                 |
|                                                 | Ref-R                | GTACAGTTTTGGTGCCAA                   |               |                                                                                                                      |
|                                                 | Ref-Probe            | GC                                   |               |                                                                                                                      |
|                                                 |                      | FAM-<br>CAGTGACTTTCTCTCCAGC<br>AATGT |               |                                                                                                                      |
| T-DNA region of pMF-P03606:FvS TP8              | Intragenic           | GTGATCGATTCCGAGCAA                   | 147           | Oligos match the junction region of P03606 (intragenic-F) and FvSTP8 CDS (Intragenic-R) on the intragenic construct. |
|                                                 | -F                   | AC                                   |               |                                                                                                                      |
|                                                 | Intragenic           | GAGAAACCTCCGGCCATA                   |               |                                                                                                                      |
|                                                 | -R                   | AG                                   |               |                                                                                                                      |
|                                                 | Intragenic<br>-Probe | VIC-<br>CGAATTCGACCCAGCTTT<br>CTTGTA |               |                                                                                                                      |

**Figure S1.** One-dimensional plot of droplets measured for fluorescence signal emitted from the endogenous reference gene *FaDHAR* (FAM<sup>TM</sup> labeled, positive droplets are blue) or the intragene *FvKNOX Pro:FvSTP8* (VIC<sup>TM</sup> labeled; positive droplets are red) in four distinct transformants (#) and untransformed cv. Shanghai Angel (SQ). Negative droplets are black.

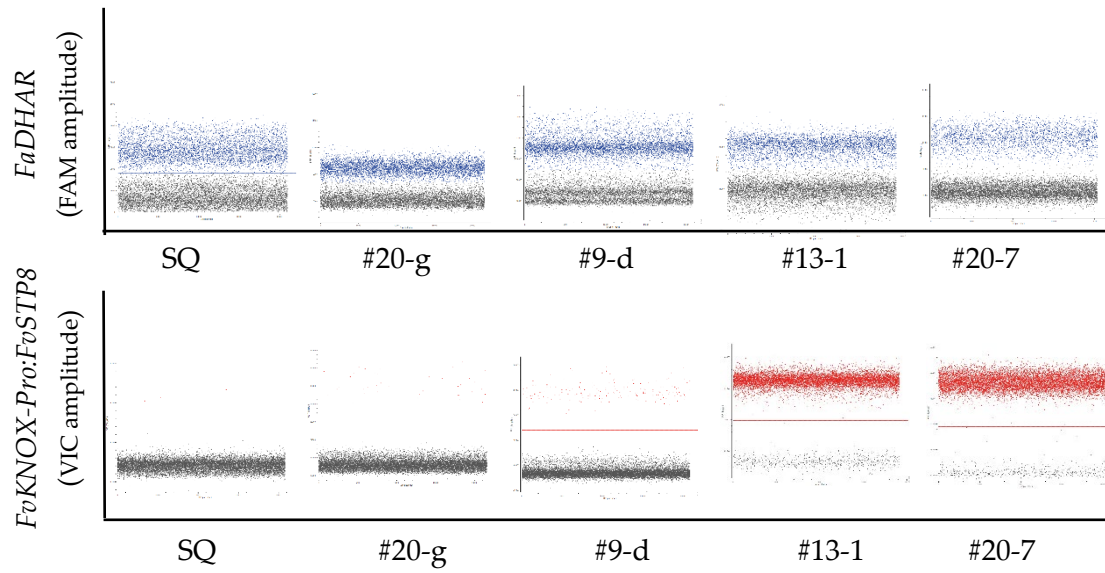

**Figure S2.** The droplets visualized in two dimensions for ddPCR analysis with the genomic DNA templates of SQ (untransformed Shanghai Angel), #20-g, #9-d and #20-7. The colors are as described in Fig.S1 but the droplets with both fluorescent probes are purple.

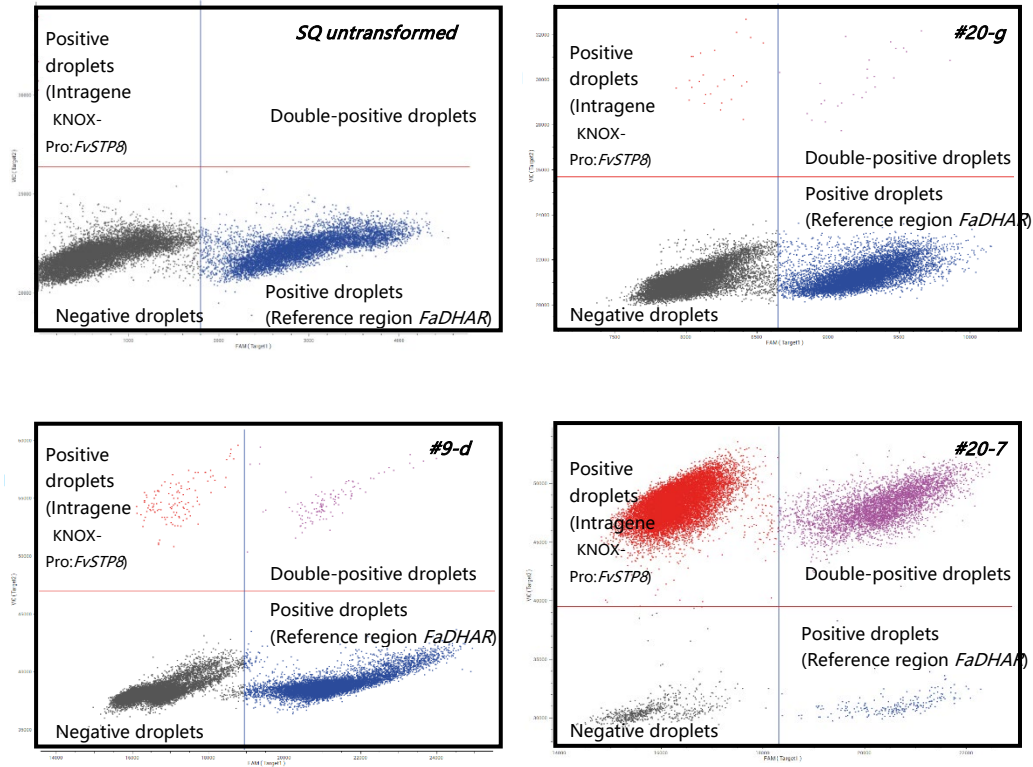

Supplement: s1 [file s1]
